# Supplementary material for: Early life malaria exposure and academic performance
Source: PLOS journal article supplement (doi:10.1371/journal.pone.0199542), 2018-06-22
Supplement: S12 (10.1371/journal.pone.0199542.s012) [file journal.pone.0199542.s012]

**S4 Table Robustness: Reduced cohorts**

|                 | (1)                  | (2)                  | (3)               | (4)              | (5)              | (6)              |
|-----------------|----------------------|----------------------|-------------------|------------------|------------------|------------------|
|                 | English              | English              | Numeracy          | Numeracy         | Kiswahili        | Kiswahili        |
| Birth-year PfPR | -1.193***<br>(0.196) | -1.047***<br>(0.277) | 0.0720<br>(0.342) | 0.447<br>(0.393) | 0.108<br>(0.237) | 0.243<br>(0.333) |
| Observations    | 160,167              | 68,329               | 160,167           | 68,329           | 160,167          | 68,329           |
| R-squared       | 0.190                | 0.754                | 0.191             | 0.746            | 0.269            | 0.754            |
| Household FE    | No                   | Yes                  | No                | Yes              | No               | Yes              |

Notes: All regressions are estimated using OLS. Dependent variable: Individual test score centred with the survey year  $\times$  age specific median. Standard errors appear in parathesis and are clustered by village and district-by-cohort. All estimates are adjusted for: individual and household characteristics (age, gender, birthorder, household size, mother's educational level and wealth), birth year, year, district and district-by-year fixed effects as well as birthyear district-level economic development (measured as nighttime lights). The sample excludes children born prior to 2002. Population weights applied. \*\*\* and \*\* denotes significance at the 1 and 5 %-level, respectively.
