# Supplementary material for: Early life malaria exposure and academic performance
Source: PLOS journal article supplement (doi:10.1371/journal.pone.0199542), 2018-06-22
Supplement: S13 (10.1371/journal.pone.0199542.s013) [file journal.pone.0199542.s013]

**S5 Table Robustness: Reduced districts**

|                 | (1)                  | (2)                  | (3)              | (4)              | (5)              | (6)              |
|-----------------|----------------------|----------------------|------------------|------------------|------------------|------------------|
|                 | English              | English              | Numeracy         | Numeracy         | Kiswahili        | Kiswahili        |
| Birth-year PfPR | -1.235***<br>(0.245) | -1.580***<br>(0.288) | 0.526<br>(0.331) | 0.561<br>(0.351) | 0.293<br>(0.303) | 0.353<br>(0.324) |
| Observations    | 186,141              | 113,299              | 186,141          | 113,299          | 186,141          | 113,299          |
| R-squared       | 0.181                | 0.724                | 0.202            | 0.714            | 0.241            | 0.717            |
| Household FE    | No                   | Yes                  | No               | Yes              | No               | Yes              |

Notes: All regression are estimated using OLS. Dependent variable: Individual test score centered with survey year  $\times$  age specific median. Standard errors appear in parathesis and are clustered by village and district-by-cohort. All estimates are adjusted for: individual and household characteristics (age, gender, birth order, household size, mother's educational level and wealth), birth year, year, district and district-by-year fixed effects as well as birthyear district-level economic development (measured as nighttime lights). The sample excludes districts where PfPR in year 2002 was greater than PfPR in 2000. Population weights applied. \*\*\* and \*\* denotes significance at the 1 and 5 %-level, respectively.
