# Supplementary material for: Early life malaria exposure and academic performance
Source: PLOS journal article supplement (doi:10.1371/journal.pone.0199542), 2018-06-22
Supplement: S14 (10.1371/journal.pone.0199542.s014) [file journal.pone.0199542.s014]

**S6 Table Robustness: Only young and old cohorts**

|                 | (1)                  | (2)                  | (3)              | (4)              | (5)              | (6)              |
|-----------------|----------------------|----------------------|------------------|------------------|------------------|------------------|
|                 | English              | English              | Numeracy         | Numeracy         | Kiswahili        | Kiswahili        |
| Birth-year PfPR | -0.929***<br>(0.180) | -0.973***<br>(0.308) | 0.218<br>(0.204) | 0.266<br>(0.349) | 0.325<br>(0.212) | 0.264<br>(0.338) |
| Observations    | 129,056              | 42,821               | 129,056          | 42,821           | 129,056          | 42,821           |
| R-squared       | 0.195                | 0.723                | 0.257            | 0.727            | 0.215            | 0.706            |
| Household FE    | No                   | Yes                  | No               | Yes              | No               | Yes              |

Notes: All regressions are estimated using OLS. Dependent variable: Individual test score centered with survey year  $\times$  age specific median. Standard errors appear in parathesis and are clustered by village and district-by-cohort. All estimates are adjusted for: individual and household characteristics (age, gender, birth order, household size, mother's educational level and wealth), birth year, year, district and district-by-year fixed effects as well as birth year district-level economic development (measured as nighttime lights). The sample excludes individuals born between 2002 and 2004. Population weights applied. \*\*\* and \*\* denotes significance at the 1 and 5 %-level, respectively.
