# Supplementary material for: Early life malaria exposure and academic performance
Source: PLOS journal article supplement (doi:10.1371/journal.pone.0199542), 2018-06-22
Supplement: S15 (10.1371/journal.pone.0199542.s015) [file journal.pone.0199542.s015]

## S7 Table Robustness: Numeracy competence cutoffs

*Dependent variable: Numeracy*

|                             | (1)                 | (2)                 | (3)                | (4)                | (5)                 | (6)                   |
|-----------------------------|---------------------|---------------------|--------------------|--------------------|---------------------|-----------------------|
| <i>Panel A: Full sample</i> |                     |                     |                    |                    |                     |                       |
|                             | Numbers             | Counting            | Magnitudes         | Addition           | Subtraction         | Full competencies     |
| Birth-year PFI              | 0.0475*<br>(0.0244) | 0.0736*<br>(0.0378) | 0.0596<br>(0.0447) | 0.0660<br>(0.0454) | -0.0387<br>(0.0402) | -0.0862**<br>(0.0425) |
| Observations                | 246,325             | 246,325             | 246,325            | 246,325            | 246,325             | 246,325               |
| R-squared                   | 0.103               | 0.153               | 0.223              | 0.236              | 0.247               | 0.230                 |
| F-stat                      |                     |                     |                    |                    |                     |                       |

*Panel B: Household fixed effects*

|                | Numbers          | Counting         | Magnitudes       | Addition          | Subtraction        | Full competencies  |
|----------------|------------------|------------------|------------------|-------------------|--------------------|--------------------|
| Birth-year PFI | 0.064<br>(0.039) | 0.079<br>(0.056) | 0.084<br>(0.061) | 0.098*<br>(0.058) | -0.093*<br>(0.055) | -0.106*<br>(0.059) |
| Observations   | 149,262          | 149,262          | 149,262          | 149,262           | 149,262            | 149,262            |
| R-squared      | 0.666            | 0.671            | 0.693            | 0.697             | 0.697              | 0.687              |
| F-stat         |                  |                  |                  |                   |                    |                    |

Notes: All regressions are estimated using OLS. Dependent variable: Competencies where column (1): Dummy variable (1= Numbers or higher), column (2): Dummy variable (1=counting or higher), column (3): Dummy variable (1=Magnitudes or higher), column (4): Dummy variable (1=addition or higher), column (5): Dummy variable (1=subtraction or higher), column (6): Dummy variable (1=Full competencies). Standard errors appear in parathesis and are clustered by village and district-by-cohort. All estimates are adjusted for: individual and household characteristics (age, gender, birth order, household size, mother's educational level and wealth), birth year, year, district and district-by-year fixed effects as well as birth year district-level economic development (measured as nighttime lights). The sample excludes individuals born between 2002 and 2004. Population weights applied. \*\*\* and \*\* denotes significance at the 1 and 5 %-level, respectively.
